# Supplementary material for: Change in exercise capacity, physical activity and motivation for physical activity at 12 months after a cardiac rehabilitation program in coronary heart disease patients: a prospective, monocentric and observational study
Source: PeerJ. 2025 Feb 14;13:e18885. doi: 10.7717/peerj.18885 (PMC11831972; doi:10.7717/peerj.18885)
Supplement: Supplemental Information 11 [file peerj-13-18885-s011.doc]

STROBE Statement—Checklist of items that should be included in reports of ***cohort studies***

|  | Item No | Recommendation | Place in the manuscript |
| --- | --- | --- | --- |
| **Title and abstract** | 1 | (*a*) Indicate the study’s design with a commonly used term in the title or the abstract | Lines 4-5 |
| (*b*) Provide in the abstract an informative and balanced summary of what was done and what was found | Lines 19-51 |
| Introduction | | |  |
| Background/rationale | 2 | Explain the scientific background and rationale for the investigation being reported | Lines 54-110 |
| Objectives | 3 | State specific objectives, including any prespecified hypotheses | Lines 111-125 |
| Methods | | |  |
| Study design | 4 | Present key elements of study design early in the paper | Lines 129-133; 146-151 |
| Setting | 5 | Describe the setting, locations, and relevant dates, including periods of recruitment, exposure, follow-up, and data collection | Lines 132-136; Lines 144-145 |
| Participants | 6 | (*a*) Give the eligibility criteria, and the sources and methods of selection of participants. Describe methods of follow-up | Lines 136-142; Lines 147-151 |
| (*b*)For matched studies, give matching criteria and number of exposed and unexposed | X |
| Variables | 7 | Clearly define all outcomes, exposures, predictors, potential confounders, and effect modifiers. Give diagnostic criteria, if applicable | Lines 183-251 |
| Data sources/ measurement | 8* | For each variable of interest, give sources of data and details of methods of assessment (measurement). Describe comparability of assessment methods if there is more than one group | Lines 183-251 |
| Bias | 9 | Describe any efforts to address potential sources of bias | Lines 134-136 may be the best match, but no additional particular effort was made |
| Study size | 10 | Explain how the study size was arrived at | Lines 254-283 |
| Quantitative variables | 11 | Explain how quantitative variables were handled in the analyses. If applicable, describe which groupings were chosen and why | Lines 290-293 |
| Statistical methods | 12 | (*a*) Describe all statistical methods, including those used to control for confounding | Lines 296-418 |
| (*b*) Describe any methods used to examine subgroups and interactions | X |
| (*c*) Explain how missing data were addressed | Lines 297-298; Lines 440-443 |
| (*d*) If applicable, explain how loss to follow-up was addressed | Lines 297-298; Lines 440-443 |
| (*e*) Describe any sensitivity analyses | X |
| Results | | |  |
| Participants | 13* | (a) Report numbers of individuals at each stage of study—eg numbers potentially eligible, examined for eligibility, confirmed eligible, included in the study, completing follow-up, and analysed | Information available only for “included in the study” and “completing follow-up” (lines 421, 444, 462, 479, 526. |
| (b) Give reasons for non-participation at each stage | X |
| (c) Consider use of a flow diagram | X |
| Descriptive data | 14* | (a) Give characteristics of study participants (eg demographic, clinical, social) and information on exposures and potential confounders | Cf. Table 1 |
| (b) Indicate number of participants with missing data for each variable of interest | Lines 421, 444, 462, 479, 526. |
| (c) Summarise follow-up time (eg, average and total amount) | Not appropriate |
| Outcome data | 15* | Report numbers of outcome events or summary measures over time | Cf. Figure 1, Figure 2, SM3, SM4, SM5 |
| Main results | 16 | (*a*) Give unadjusted estimates and, if applicable, confounder-adjusted estimates and their precision (eg, 95% confidence interval). Make clear which confounders were adjusted for and why they were included | Not appropriate |
| (*b*) Report category boundaries when continuous variables were categorized | Not appropriate |
| (*c*) If relevant, consider translating estimates of relative risk into absolute risk for a meaningful time period | Not appropriate |
| Other analyses | 17 | Report other analyses done—eg analyses of subgroups and interactions, and sensitivity analyses | Not appropriate |
| Discussion | | |  |
| Key results | 18 | Summarise key results with reference to study objectives | Lines 546-564 |
| Limitations | 19 | Discuss limitations of the study, taking into account sources of potential bias or imprecision. Discuss both direction and magnitude of any potential bias | Lines 715-758 |
| Interpretation | 20 | Give a cautious overall interpretation of results considering objectives, limitations, multiplicity of analyses, results from similar studies, and other relevant evidence | Lines 761-781 |
| Generalisability | 21 | Discuss the generalisability (external validity) of the study results | Lines 718-722, Lines 781-785 |
| Other information | | |  |
| Funding | 22 | Give the source of funding and the role of the funders for the present study and, if applicable, for the original study on which the present article is based | None |

*Give information separately for exposed and unexposed groups.

**Note:** An Explanation and Elaboration article discusses each checklist item and gives methodological background and published examples of transparent reporting. The STROBE checklist is best used in conjunction with this article (freely available on the Web sites of PLoS Medicine at http://www.plosmedicine.org/, Annals of Internal Medicine at http://www.annals.org/, and Epidemiology at http://www.epidem.com/). Information on the STROBE Initiative is available at http://www.strobe-statement.org.
